# Supplementary material for: A siderophore-inspired two-dimensional Fe–hydroxamate metal–organic framework
Source: Royal Society of Chemistry journal article supplement (doi:10.1039/d3ce00022b), 2023-01-01
Supplement: d3ce00022b1.pdf [file d3ce00022b1.pdf]

## Supporting Information

### **Siderophore-Inspired Two-Dimensional Fe-Hydroxamate Metal-Organic Framework**

*Wenlei Tang,<sup>a</sup> Zhen-Wu Shao,<sup>a</sup> Li Xiong,<sup>a</sup> Zhiyuan Zhang,<sup>a</sup> Kaiyuan Tan,<sup>a</sup>  
Xuan Feng,<sup>a</sup> Wenjing Wu,<sup>a</sup> and Chong Liu<sup>a\*</sup>*

<sup>a</sup> School of Chemical Engineering, Sichuan University, Chengdu 610065,  
China

Email: [liuchong@scu.edu.cn](mailto:liuchong@scu.edu.cn) (C.L.)

### **Contents**

|                                             |           |
|---------------------------------------------|-----------|
| <b>1. General information .....</b>         | <b>2</b>  |
| <b>2. Synthesis of ligand and MOF.....</b>  | <b>4</b>  |
| <b>3. Characterization of MOFs .....</b>    | <b>6</b>  |
| <b>4. Electrochemical experiments .....</b> | <b>15</b> |
| <b>5. References.....</b>                   | <b>20</b> |

## 1. General information

All purchased chemicals were used without further purification except where otherwise noted.

Single-crystal X-ray diffraction (SC-XRD) data for SUM-31 on a Bruker D8 Venture Metaljet Photon III diffractometer. The crystal was kept at 193.00 K during data collection. Using Olex2,<sup>1</sup> the structure was solved with the SHELXT<sup>2</sup> structure solution program using Intrinsic Phasing and refined with the SHELXL<sup>3</sup> refinement package using Least Squares minimization.

Powder X-ray diffraction (PXRD) patterns were collected using a Rigaku MiniFlex600 operating at 40 kV, 40 mA for Cu K $\alpha$ , ( $\lambda = 1.54178$  Å) with a scan speed of 10° min<sup>-1</sup> from 3 to 50° at a step size of 0.01°.

<sup>1</sup>H NMR spectrum was collected on a JNM-ECZ400S/L1 (400 MHz) spectrometer (JEOL Ltd., Tokyo, Japan).

Thermogravimetric analysis (TGA) was carried out on a TA Discovery SDT 650 simultaneous thermal analyzer from room temperature to 800 °C at a heating rate of 10 °C min<sup>-1</sup> in a N<sub>2</sub> flow of 100 mL min<sup>-1</sup>.

N<sub>2</sub> adsorption-desorption experiments were performed on a BELSORP MAX instrument at 77 K. Activation procedure is described in Section 3.3.

CHNS elemental Analysis was carried out on an Elementar Vario UniCube instrument.

Electrochemical experiments were conducted on a CHI 660E electrochemical workstation (Shanghai CH Instruments Inc., China) in a three-electrode system, details are given in section 4.

Optical images were acquired with a Rui Hong BM-500T optical microscope.

**Table S1.** Structural information of different hydroxamate-containing

MOFs

| MOF       | Metal | Linker               | M–O(hydroxyl) (Å) | M–O(carbonyl) (Å) | Ref. |
|-----------|-------|----------------------|-------------------|-------------------|------|
| SUM-1(Zr) | Zr    | H <sub>2</sub> -BDHA | 2.158             | 2.214             | 4    |
| SUM-1(Hf) | Hf    | H <sub>2</sub> -BDHA | 2.158             | 2.167             | 4    |
| SUM-9     | In    | H-BDHA               | 2.132/2.118/2.158 | 2.165/2.176/2.164 | 5    |
| MUV-11    | Ti    | H <sub>2</sub> -BDHA | 2.109/2.08/2.108  | 2.127/2.136/2.154 | 6    |
| Fe-HAF-1  | Fe    | H <sub>4</sub> -BPTH | 1.977             | 2.03              | 7    |
| Fe-HAF-2  | Fe    | H <sub>4</sub> -TPTH | 2.016/2.018/2.018 | 2.082/2.082/2.083 | 8    |
| TI-MOF    | Tl    | H <sub>2</sub> -MHA  | 2.593/2.885       | 2.723/2.739       | 9    |

## 2. Synthesis of ligand and MOF

### 2.1 Synthesis of *E*-H<sub>2</sub>edh

The synthesis of ligand *E*-ethylenedihydroxamic acid (*E*-H<sub>2</sub>edh) was carried out according to the procedure previously reported<sup>10</sup>. The identity and purity of the ligand were confirmed by <sup>1</sup>H NMR (Figure S1).

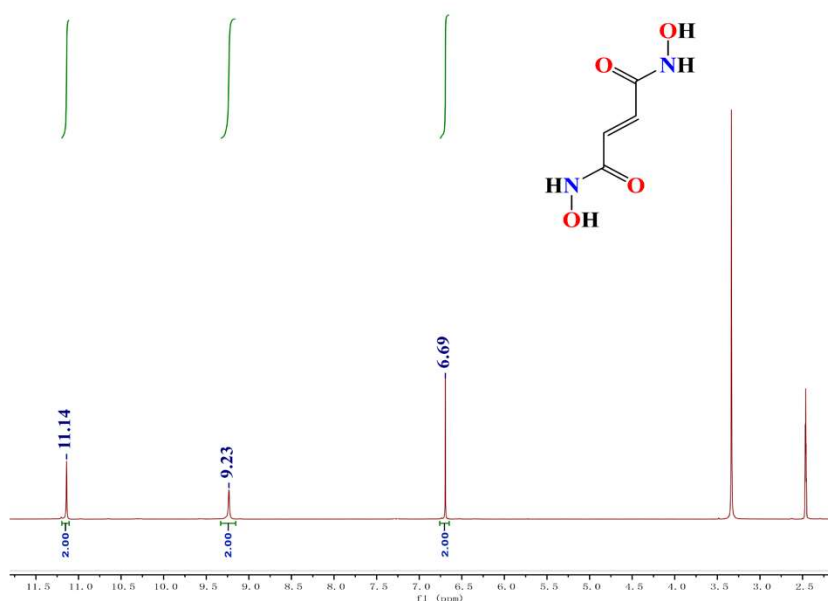

**Figure S1.** <sup>1</sup>H NMR spectrum of *E*-H<sub>2</sub>edh in DMSO-*d*<sub>6</sub>.

### 2.2 Synthesis of SUM-31

*E*-H<sub>2</sub>edh (27.0 mg, 0.185 mmol) and Fe(NO<sub>3</sub>)<sub>3</sub>·9H<sub>2</sub>O (12.0 mg, 0.0297 mmol) were mixed with DMF (0.750 mL) and DMSO (0.250 mL) in a 4-mL glass vial before tightly capped and briefly sonicated. The mixture was heated in an isothermal oven at 100 °C for 24 hours. After cooling to room temperature, maroon block-shaped crystals (Figure S2) were collected and washed with DMF.

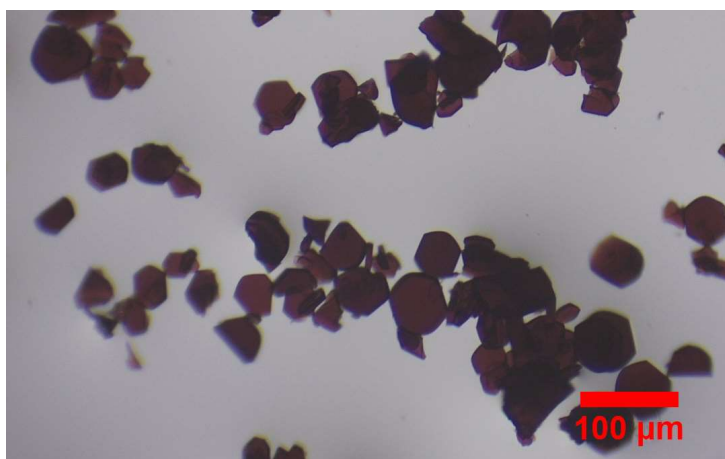

**Figure S2.** Optical image of large SUM-31 crystals.

Additionally, SUM-31 could also be prepared in smaller sizes for electrochemical experiments, simply by decreasing the temperature and concentration. *E*-H<sub>2</sub>edh (9.7 mg, 0.0665 mmol) and Fe(NO<sub>3</sub>)<sub>3</sub>·9H<sub>2</sub>O (6.0 mg, 0.0149 mmol) were mixed with DMF (0.92 mL) and DMSO(0.08 mL) in a 4-mL glass vial before tightly capped and briefly sonicated. The mixture was heated in an isothermal oven at 80 °C for 24 hours. After cooling to room temperature, the crystals (Figure S3) were collected and washed with DMF.

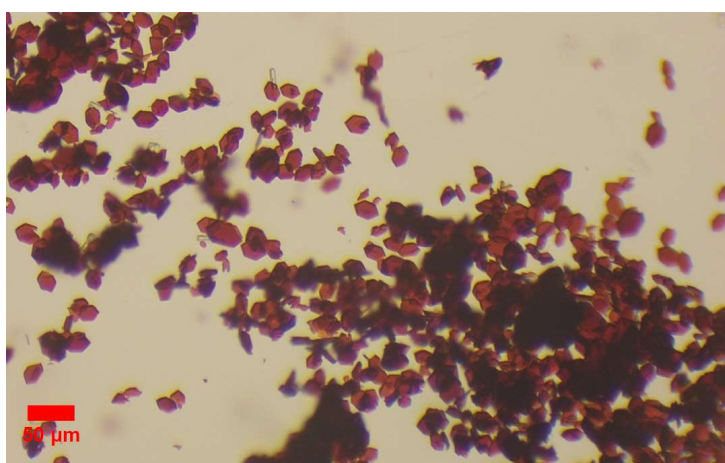

**Figure S3.** Optical image of small SUM-31 crystals.

### 3. Characterization of MOFs

#### 3.1 Crystallographic study of SUM-31

**Table S2.** Crystal data and structure refinement details for SUM-31

|                                                |                                                                                |
|------------------------------------------------|--------------------------------------------------------------------------------|
| CCDC depository number                         | 2223527                                                                        |
| Identification code                            | SUM-31                                                                         |
| Empirical formula                              | C <sub>12</sub> H <sub>12</sub> Fe <sub>2</sub> N <sub>6</sub> O <sub>12</sub> |
| Formula weight                                 | 543.98                                                                         |
| Temperature/K                                  | 193.00                                                                         |
| Crystal system                                 | monoclinic                                                                     |
| Space group                                    | C2/c                                                                           |
| a/Å                                            | 13.635(18)                                                                     |
| b/Å                                            | 21.87(2)                                                                       |
| c/Å                                            | 17.252(18)                                                                     |
| $\alpha = \gamma/^\circ$                       | 90                                                                             |
| $\beta/^\circ$                                 | 111.89(5)                                                                      |
| Volume/Å <sup>3</sup>                          | 4773(10)                                                                       |
| Z                                              | 4                                                                              |
| $\rho_{\text{calc}}/\text{cm}^3$               | 0.757                                                                          |
| $\mu/\text{mm}^{-1}$                           | 3.568                                                                          |
| F(000)                                         | 1096.0                                                                         |
| Crystal size/mm <sup>3</sup>                   | 0.12 × 0.1 × 0.1                                                               |
| Radiation                                      | GaK $\alpha$ ( $\lambda = 1.34139$ )                                           |
| 2 $\Theta$ range for data collection/ $^\circ$ | 7.022 to 121.594                                                               |
| Index ranges                                   | -17 ≤ h ≤ 17, -27 ≤ k ≤ 26, -22 ≤ l ≤ 16                                       |
| Reflections collected                          | 15851                                                                          |
| Independent reflections                        | 5217 [Rint = 0.0877, Rsigma = 0.1073]                                          |
| Data/restraints/parameters                     | 5217/139/191                                                                   |
| Goodness-of-fit on F2                          | 0.965                                                                          |
| Final R indexes [ $I \geq 2\sigma(I)$ ]        | R1 = 0.0922, wR2 = 0.2820                                                      |
| Final R indexes [all data]                     | R1 = 0.1491, wR2 = 0.3227                                                      |
| Largest diff. peak/hole / e Å <sup>-3</sup>    | 0.54/-0.71                                                                     |

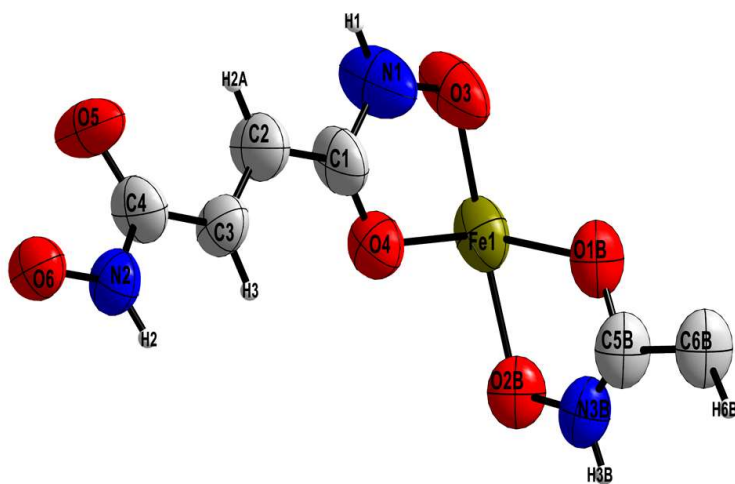

**Figure S4.** ORTEP diagram of the asymmetric unit of SUM-31 (50% probability factor for the thermal ellipsoids), with disorders removed, generated in Diamond 3.2k.

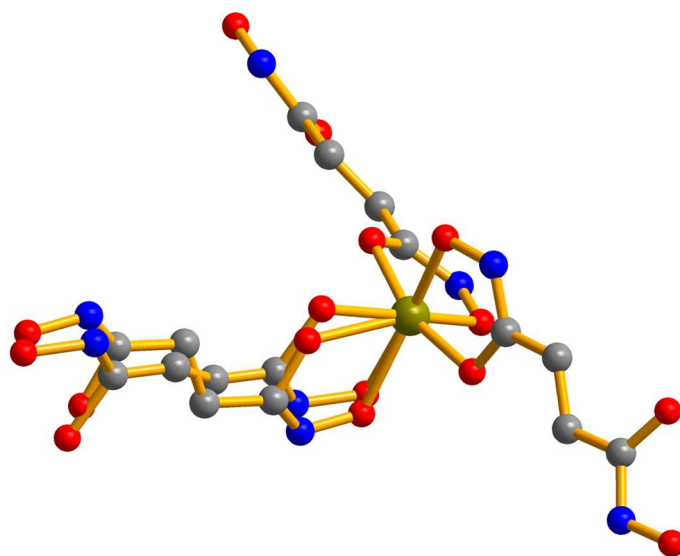

**Figure S5.** Coordination environment of the homoleptic  $\text{Fe}(E\text{-edh})_3$  moiety in SUM-31, showing disorder as determined by SC-XRD.

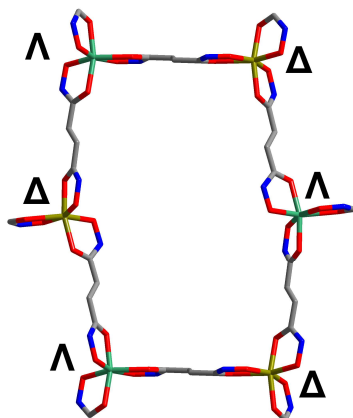

**Figure S6.** Racemic Fe(hydroxamate)<sub>3</sub> centers of  $\Delta$  and  $\Lambda$  configurations in a hexagonal ring of SUM-31.

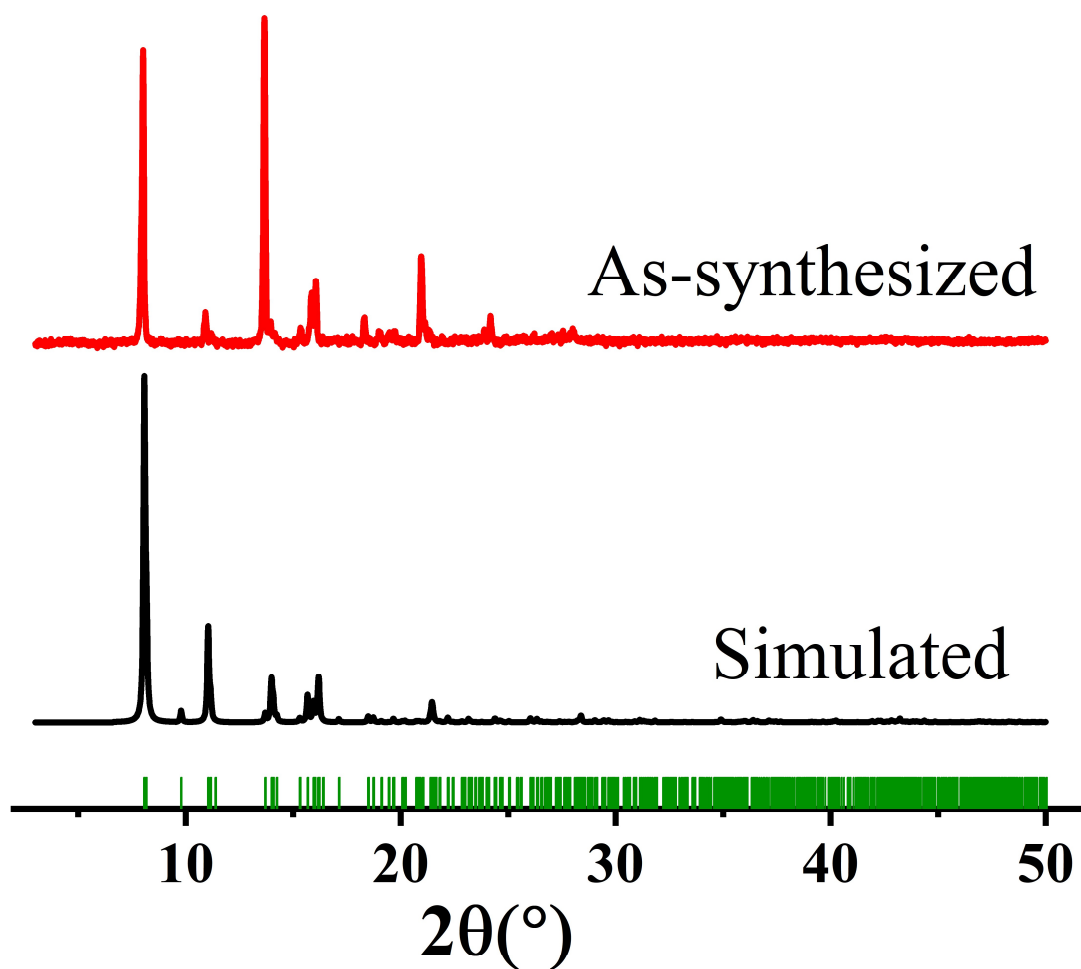

**Figure S7.** PXRD patterns comparing the simulated (black) and experimental (red), with calculated peak positions indicated by green bars.



**Table S3.** Fe–O bond lengths of CSD-mined structures and SUM-31

| Refcode          | Fe–O(carbonyl) <sub>min</sub> (Å) | Refcode          | Fe–O(hydroxyl) <sub>min</sub> (Å) |
|------------------|-----------------------------------|------------------|-----------------------------------|
| <b>This work</b> | <b>1.923</b>                      | SEMKOM           | 1.913                             |
| DEWNAU           | 1.971                             | FEROXE10         | 1.938                             |
| DEWNAU           | 1.974                             | <b>This work</b> | <b>1.938</b>                      |
| WAKXAH           | 1.974                             | SUXREI           | 1.946                             |
| XUPVIP           | 1.974                             | UDAWUS           | 1.948                             |
| DORGEX           | 1.978                             | FTAFUS10         | 1.949                             |
| COFDIK10         | 1.986                             | DUPJON           | 1.95                              |
| JEPRAx           | 1.995                             | TEQKUV           | 1.952                             |
| QERKUW           | 1.995                             | TEQKUV01         | 1.952                             |
| UDAXAZ           | 1.997                             | BURDIB           | 1.953                             |
| COFDIK10         | 2.008                             | FERCRN10         | 1.955                             |
| BOPMUO01         | 2.009                             | EKOTUV           | 1.96                              |
| UDAWUS           | 2.009                             | OCELOX           | 1.961                             |
| EKOTOP           | 2.010                             | UNEVUE           | 1.961                             |
| OCELOX           | 2.011                             | CUJHIY           | 1.962                             |
| YOLBUX           | 2.012                             | JEPRAx           | 1.962                             |
| UNEVUE           | 2.014                             | QUXXOX           | 1.962                             |
| CUJHIY           | 2.016                             | CETWIH           | 1.963                             |
| EKOTAB           | 2.016                             | COFDIK10         | 1.963                             |
| CUJHOE           | 2.019                             | EKOVAx           | 1.963                             |
| EKOTIJ           | 2.020                             | IRADEK           | 1.964                             |
| EKOTUV           | 2.020                             | QOZDUE           | 1.964                             |
| FERMAH11         | 2.020                             | TEQKUV           | 1.964                             |
| UDAWUS           | 2.020                             | TEQKUV01         | 1.964                             |
| IRADEK           | 2.021                             | SISSAO           | 1.966                             |
| EKOVAx           | 2.022                             | BUHQUQ           | 1.967                             |
| FERCRN10         | 2.023                             | FERCRN10         | 1.967                             |
| YOLBUX           | 2.023                             | FERMAH11         | 1.967                             |
| FERRID10         | 2.024                             | FERRID10         | 1.967                             |
| UNEWEP           | 2.024                             | IRADEK           | 1.967                             |
| SUXREI           | 2.026                             | OGULUA           | 1.968                             |
| QERKUW           | 2.028                             | SIPMEJ           | 1.968                             |
| QOZDUE           | 2.028                             | FEBOAH01         | 1.969                             |
| CUJHIY           | 2.029                             | COFDIK10         | 1.971                             |
| OFUYET           | 2.029                             | OFUYET           | 1.971                             |
| UNEWAL           | 2.029                             | OGULUA           | 1.971                             |
| SEMKOM           | 2.031                             | OGULUA           | 1.971                             |
| FTAFUS10         | 2.032                             | SUXREI           | 1.973                             |
| TEQKUV           | 2.032                             | BOPMUO01         | 1.974                             |
| TEQKUV01         | 2.032                             | FEBOAH           | 1.974                             |

|          |       |          |       |
|----------|-------|----------|-------|
| FERCRN10 | 2.033 | FEBOAH02 | 1.975 |
| TEQKUV   | 2.033 | SISSES   | 1.975 |
| TEQKUV01 | 2.033 | UNEWEP   | 1.975 |
| OGULUA   | 2.035 | IRADEK   | 1.977 |
| BUHQUQ   | 2.036 | QERKUW   | 1.977 |
| FEBOAH01 | 2.036 | UDAXAZ   | 1.977 |
| SISSAO   | 2.036 | CUJHOE   | 1.979 |
| SUXREI   | 2.036 | EKOTIJ   | 1.981 |
| FEBOAH   | 2.039 | OGUMAH   | 1.981 |
| IRADEK   | 2.039 | VAYYEB   | 1.981 |
| OGULUA   | 2.041 | CUJHIY   | 1.982 |
| SIPMEJ   | 2.042 | IRADEK   | 1.983 |
| DUPJON   | 2.044 | UDAWUS   | 1.984 |
| OGULUA   | 2.044 | YOLBUX   | 1.984 |
| QUXXOX   | 2.044 | YOLBUX   | 1.985 |
| SISSES   | 2.044 | EKOTAB   | 1.986 |
| OGUMAH   | 2.047 | UNEWAL   | 1.986 |
| VAYYEB   | 2.048 | OGULUA   | 1.991 |
| FEBOAH02 | 2.049 | DEWNAU   | 1.993 |
| FEROXE10 | 2.050 | EKOTOP   | 1.996 |
| OGULUA   | 2.054 | QERKUW   | 1.997 |
| BURDIB   | 2.055 | DORGEX   | 2.002 |
| IRADEK   | 2.058 | DEWNAU   | 2.004 |
| CETWIH   | 2.059 | WAKXAH   | 2.013 |
| IRADEK   | 2.066 | FAVFER   | 2.016 |
| FAVFER   | 2.082 | XUPVIP   | 2.017 |

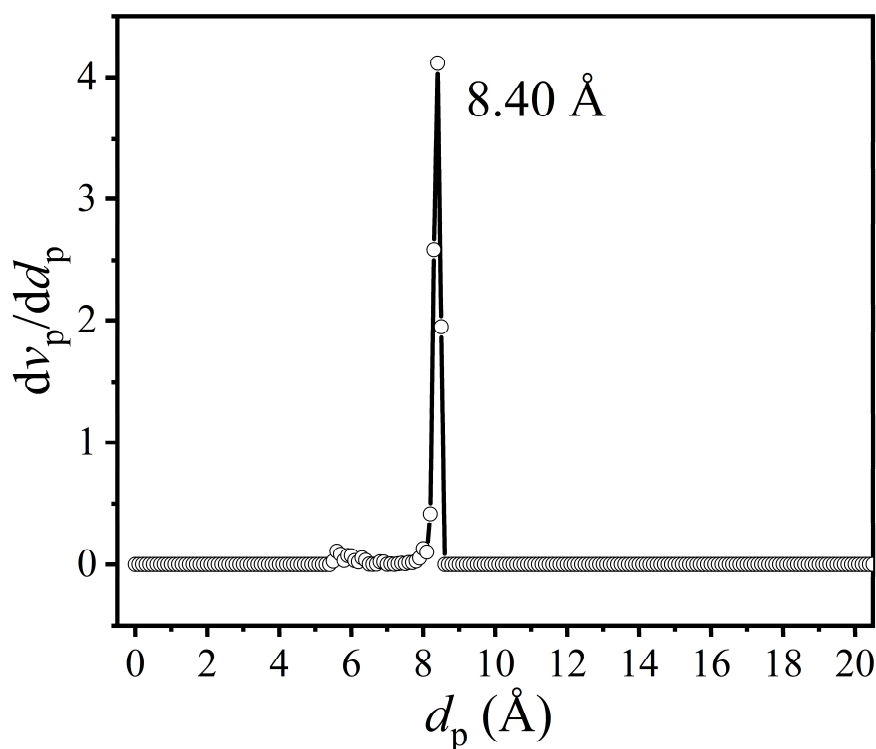

**Figure S8.** Pore size distribution plot of SUM-31 as calculated by Zeo++.<sup>11</sup>

### 3.2 Composition analysis of SUM-31

For TGA and CHNS elemental analysis, the as-synthesized MOF crystals were washed with dry DMF (3X), ethanol (3X) and dried with N<sub>2</sub> flow until they became free-flowing solids.

For TGA, the solid sample was loaded into a ceramic pan for analysis (Fig. 2b in the main text). The ca. 31.12% weight loss corresponds to a composition of Fe<sub>8</sub>(edh)<sub>12</sub>·3DMSO·13.5DMF.

For CHNS elemental analysis, C: calc. 33.39%, found 32.82%; H: calc. 4.72%, found 5.35%; N: calc. 15.46%, found 15.39%; S: calc. 2.83%, found 3.00%.

Of note, SC-XRD data (solvent mask) revealed a presence of 796.5 (solvent) electrons per unit cell, which corresponds to a solvent content of

ca. 3DMSO·16.5DMF. The discrepancy was reasonable considering that the crystal was fully solvated when mounted for SC-XRD analysis comparing to a N<sub>2</sub>-dried sample for TGA/CHNS elemental analysis.

### 3.3 N<sub>2</sub> sorption of SUM-31

As-synthesized SUM-31 MOFs crystals of smaller sizes (section 2.2) were washed with dry DMF (3X) and exchanged with ethanol (3X) for 72 hours. Then the crystals were activated using a Tousimis Samdri PVT-3D critical dryer before transferred to the degassing station of BELSORP MAX for 12 hours of degassing at room temperature. N<sub>2</sub> adsorption-desorption isotherms (Figure S9) were acquired at 77 K, and the Brunauer-Emmett-Teller (BET) surface area of SUM-31 was calculated to be only 29.88 m<sup>2</sup> g<sup>-1</sup>. After sorption, the MOF crystals were examined using PXRD (Figure S10) and then loaded into a ceramic pan for TGA (Figure S11).

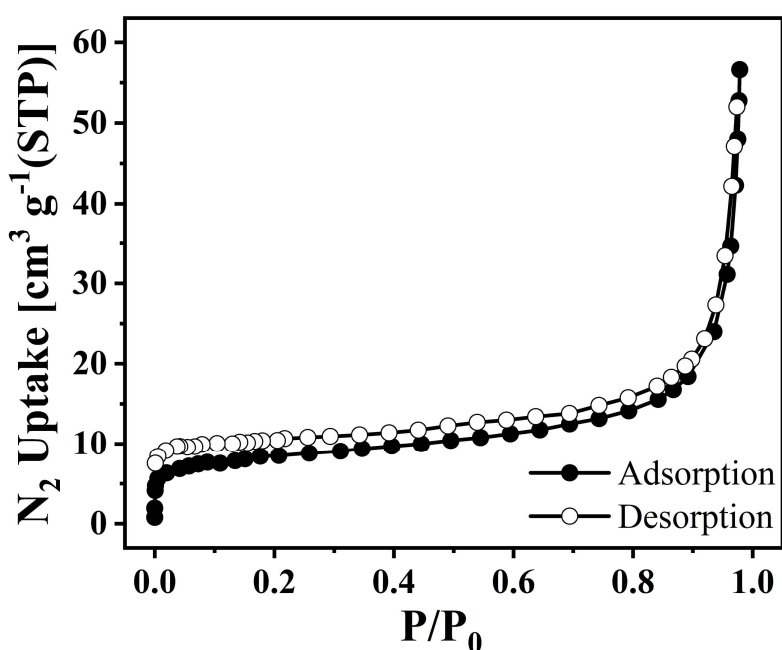

**Figure S9.** N<sub>2</sub> adsorption-desorption isotherms of SUM-31 at 77 K.

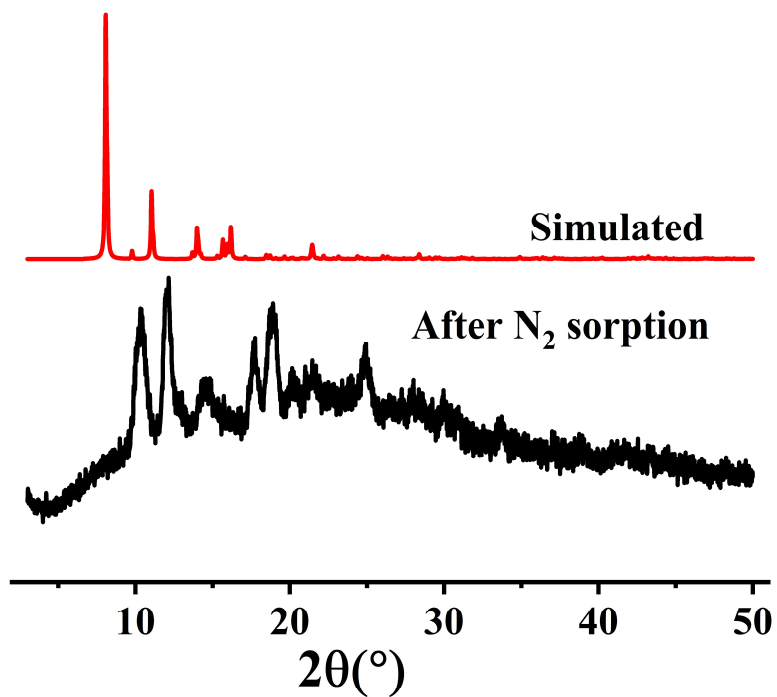

**Figure S10.** PXRD patterns of SUM-31 comparing the simulated (red) and experimental after N<sub>2</sub> sorption (black).

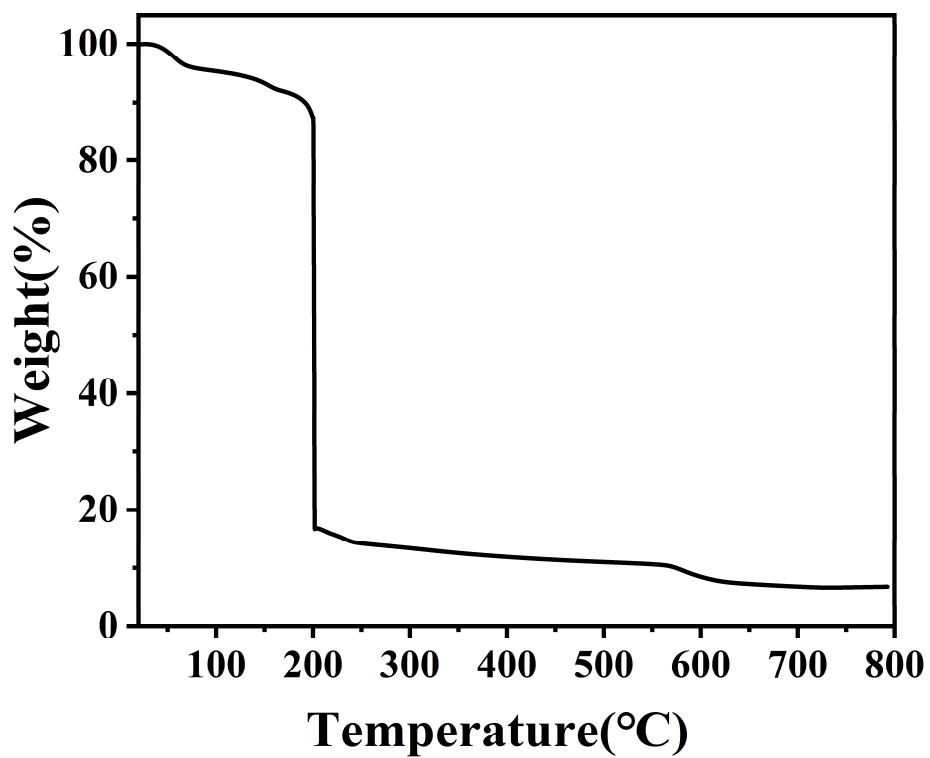

**Figure S11.** TGA plot of SUM-31 after N<sub>2</sub> sorption.

### 3.4 Stability of SUM-31

For aqueous solution treatments, the as-synthesized MOF crystals were washed with dry DMF(3X) and aqueous solutions of various pH values (2X) before soaked in the respective pH solution for 24 hours. Then the crystals were examined with PXRD.

#### 4. Electrochemical experiments

Electrochemical experiments were conducted with a CHI 660E electrochemical workstation (Shanghai CHI Instrument Co., China) in a three-electrode system. The modified glassy carbon electrode (GCE), a saturated calomel electrode (SCE), and a Pt foil (1 cm<sup>2</sup>) were used as the working electrode, reference electrode, and counter electrode, respectively.

For the electrolyte solutions in electrochemical experiments, an aqueous solution of pH = 10.25 was prepared by adding KOH to 0.1 M K<sub>2</sub>HPO<sub>4</sub>. Aqueous solutions of pH = 4.53 and pH = 6.98 were prepared by adjusting the ratios of 0.1 M K<sub>2</sub>HPO<sub>4</sub> and 0.1 M NaH<sub>2</sub>PO<sub>4</sub>. Before each experiment, the electrolyte solution was purged with N<sub>2</sub> for 15 min to remove residual dissolved oxygen.

Cyclic voltammetry (CV) of the working electrode was tested at a scan rate of 100 mV s<sup>-1</sup>. Differential pulse voltammogram (DPV) was acquired with the pulse amplitude, pulse width, and pulse period set to be 50 mV s<sup>-1</sup>, 50 ms, and 500 ms, respectively.

##### 4.1 Preparation of SUM-31 aqueous suspension

The as-synthesized SUM-31 crystals of smaller sizes (section 2.2) were centrifuged and washed with DMF (2X) and ethanol (2X) before drying in vacuo. 1.5 mg of SUM-31 samples were mixed with 1 mL of ethanol and grinded for 10 min to obtain a uniform aqueous suspension.

##### 4.2 Preparation of SUM-31/GCE working electrode

GCE was polished successively with 1.0 mm, 0.3 mm, and 0.05 mm alumina slurry on a polishing cloth (Buehler, Esslingen, Germany) to produce a mirror-like surface. Then, it was sonicated with ethanol/water (1:1, v/v) solution for 10 min and dried by N<sub>2</sub> gas stream. Next, 10 μL of the abovementioned SUM-31 aqueous suspension (1.5 mg mL<sup>-1</sup>) was coated onto the GCE bare surface and dried at room temperature. 10 μL of a 0.05% Nafion solution, which was obtained by diluting 5% Nafion ethanol/water (1:1 v/v) solution with ethanol, was dropped onto the surface of the composites and dried at 50 °C for 1 h.

#### 4.3 CV and DPV analysis

The proposed electrochemical mechanism is shown below:

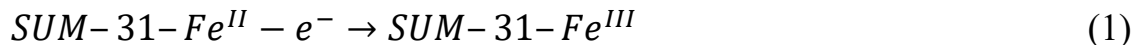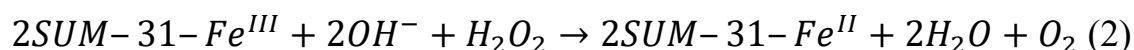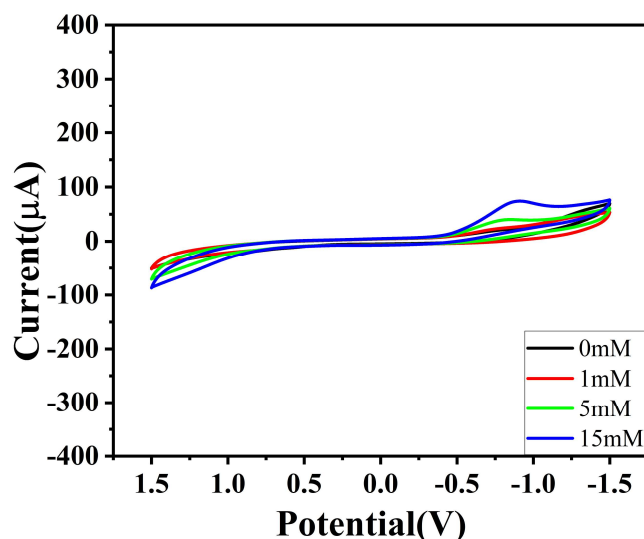

**Figure S12.** CV curves of SUM-31/GCE electrode at a scan rate of 100 mV/s in electrolyte (pH = 4.53) containing 0 to 15 mM H<sub>2</sub>O<sub>2</sub>.



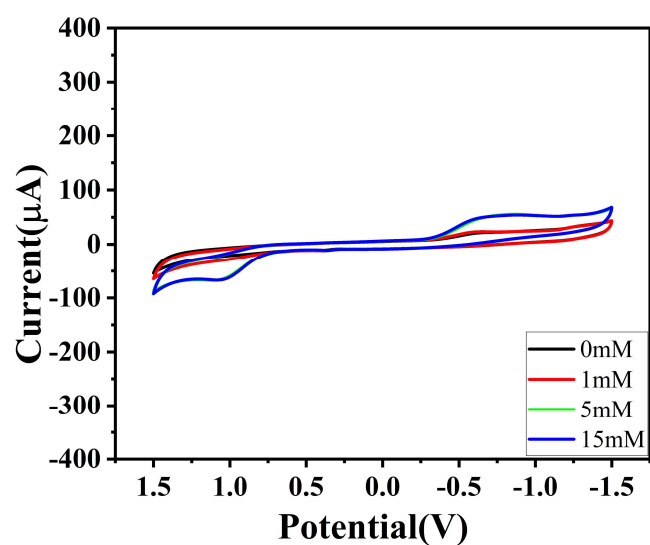

**Figure S13.** CV curves of SUM-31/GCE electrode at a scan rate of 100 mV/s in electrolyte (pH = 6.98) containing 0 to 15 mM H<sub>2</sub>O<sub>2</sub>.

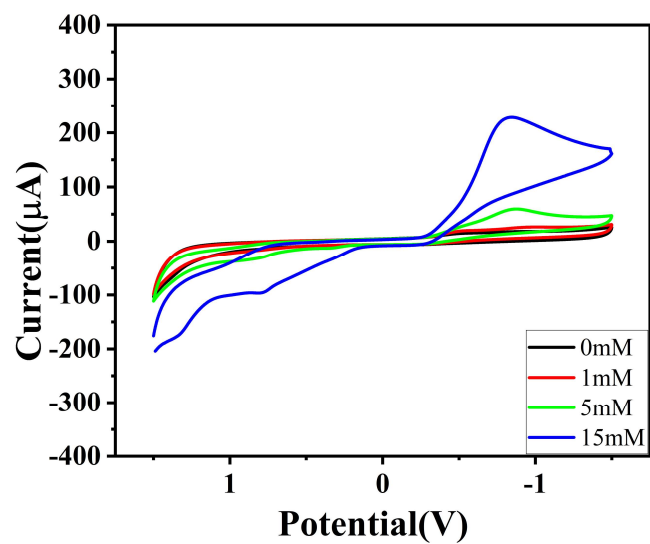

**Figure S14.** CV curves of SUM-31/GCE electrode at a scan rate of 100 mV/s in electrolyte (pH = 10.25) containing 0 to 15 mM H<sub>2</sub>O<sub>2</sub>.

For the blank control experiment without SUM-31, 0.05% Nafion

solution was dropped onto the surface of the GCE (pre-treated as described in section 4.2) and dried at 50 °C for 1 h.

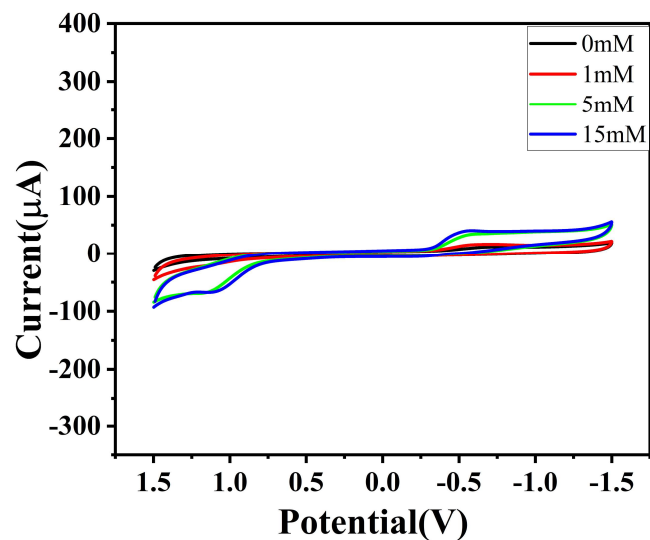

**Figure S15.** CV curves of GCE electrode at a scan rate of 100 mV/s in electrolyte (pH = 10.25) containing 0 to 15 mM H<sub>2</sub>O<sub>2</sub>.

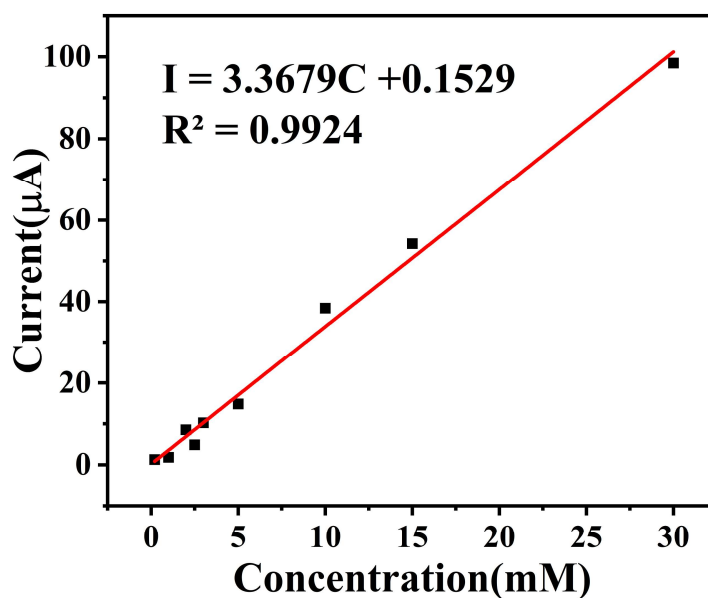

**Figure S16.** Enlarged Fig. 3b inset of the main text: the linear relationship between the currents and the concentrations of H<sub>2</sub>O<sub>2</sub>.

**Table S4.** Comparison of select reported H<sub>2</sub>O<sub>2</sub> sensors

| Electrode material                                    | Method | Linear range<br>(mM) | Detection<br>limit ( $\mu$ M) | Ref.      |
|-------------------------------------------------------|--------|----------------------|-------------------------------|-----------|
| Ag NW array                                           | i-t    | 0.1–3.1              | 29.2                          | 12        |
| Co-MOF                                                | i-t    | n/a                  | 2.9                           | 13        |
| CuMOFs@FeP-pSC4-<br>AuNPs                             | DPV    | 0.5–2.5              | 47                            | 14        |
| CNP-CuMOF                                             | CV     | 1–20                 | n/a                           | 15        |
| rGO-Au                                                | i-t    | 1.5–7.6              | 19                            | 16        |
| ITO/(PEDOT-PdBI- <i>co</i> -<br>HKCN)/GO <sub>x</sub> | i-t    | 0.25–2.5             | 176                           | 17        |
| MnO <sub>2</sub> nanowires/ERGO<br>paper              | i-t    | 0.1–45.4             | 10                            | 18        |
| PCS/HB/CPE                                            | CV     | 0.1–5                | 32                            | 19        |
| SUM-31                                                | DPV    | 0.2–30               | 1.4                           | This work |

## 5. References

1. O. V. Dolomanov, L. J. Bourhis, R. J. Gildea, J. A. K. Howard and H. Puschmann, *J. Appl. Cryst.*, **2009**, *42*, 339-341.
2. G. M. Sheldrick, *Acta. Crystallogr. A*, **2015**, *71*, 3-8.
3. G. M. Sheldrick, *Acta. Crystallogr. C*, **2015**, *71*, 3-8.
4. Q. Lai, Z. Q. Chu, X. Xiao, D. Dai, T. Song, T. Y. Luo, W. Tang, X. Feng, Z. Zhang, T. Li, H. Xiao, J. Su and C. Liu, *Chem. Commun.*, **2022**, *58*, 3601-3604.
5. X. Feng, Z. Qin, Q. Lai, Z. Zhang, Z.-W. Shao, W. Tang, W. Wu, Z. Dai and C. Liu, *Sep. Purif. Technol.*, **2023**, *305*, 122476.
6. N. M. Padial, J. Castells-Gil, N. Almora-Barrios, M. Romero-Angel, I. da Silva, M. Barawi, A. Garcia-Sanchez, V. A. dela Pena O'Shea and C. Marti-Gastaldo, *J. Am. Chem. Soc.*, **2019**, *141*, 13124-13133.
7. J. A. Chiong, J. Zhu, J. B. Bailey, M. Kalaj, R. H. Subramanian, W. Xu, S. M. Cohen and F. A. Tezcan, *J. Am. Chem. Soc.*, **2020**, *142*, 6907-6912.
8. J. Zhu, L. Samperisi, M. Kalaj, J. A. Chiong, J. B. Bailey, Z. Zhang, C. J. Yu, R. E. Sikma, X. Zou, S. M. Cohen, Z. Huang and F. A. Tezcan, *Dalton. T.*, **2022**, *51*, 1927-1935.
9. S.-H. Huang, R.-J. Wang and T. C. W. Mak, *J. Chem. S., Dalton Trans.*, **1991**, *5*, 1379-1381.
10. J. B. Bailey, L. Zhang, J. A. Chiong, S. Ahn and F. A. Tezcan, *J. Am. Chem. Soc.*, **2017**, *139*, 8160-8166.
11. T. F. Willems, C. H. Rycroft, M. Kazi, J. C. Meza, M. Haranczyk, *Micropor. Mesopor. Mater.*, **2012**, *149*, 134-141
12. E. Kurowska, A. Brzózka, M. Jarosz, G. D. Sulka and M. Jaskuła, *Electrochim. Acta.*, **2013**, *104*, 439-447.
13. M. Zhang, G. Wang, B. Zheng, L. Li, B. Lv, H. Cao and M. Chen, *Nanoscale* **2019**, *11*, 5058-5063.
14. X. Hu, Y. Huang, J. Chen, X. Zhu, Z. Mao, Y. Wang, R. Hu and H. Chen, *Sensor. Actuat. B-Chem.*, **2021**, *342*, 130076.

15. M. Hesari, R. Jia and M. V. Mirkin, *Chem. Electro. Chem.*, **2022**, *9*, e2022003.
16. X. Liu, T. Shen, Z. Zhao, Y. Qin, P. Zhang, H. Luo and Z.-X. Guo, *Mater. Lett.*, **2018**, *229*, 368-371.
17. T. Y. Tekbasoglu, T. Soganci, M. Ak, A. Koca and M. K. Sener, *Biosens. Bioelectron.*, **2017**, *87*, 81-88.
18. Y. Shim, M. H. Nam, S. W. Hyuk, S. Y. Yoon and J. M. Song, *Anal. Chim. Acta.*, **2015**, *853*, 501-507.
19. V. Gautam, K. P. Singh and V. L. Yadav, *Int. J. Biol. Macromol.*, **2018**, *111*, 1124-1132.
